# Supplementary material
Source: Springer Nature journal article supplement (https://www.springermedizin.de/resource/supplementary/12889_2013_5965_MOESM21_ESM.pdf/9496670)
Supplement: MOESM21 [file 9496670]

|       | the 1st survey | the 2nd survey   | the 3rd survey   | the 4th survey   | the 5th survey   |
|-------|----------------|------------------|------------------|------------------|------------------|
| 2005  | 1562           | 890<br>(56.98%)  | 1336<br>(85.53%) | 1176<br>(75.29%) | 1327<br>(84.96%) |
| 2006  | 3145           | 2741<br>(87.15%) | 2721<br>(86.52%) | 2596<br>(82.54%) | 2019<br>(64.20%) |
| 2007  | 1286           | 1209<br>(94.01%) | 1215<br>(94.48%) | 770<br>(59.88%)  |                  |
| 2008  | 460            | 460<br>(100.00%) | 460<br>(100.00%) |                  |                  |
| total | 6453           | 5300<br>(82.13%) | 5732<br>(88.83%) | 4542<br>(70.39%) | 3346<br>(51.85%) |
